# Supplementary material for: Decadal evaluation of regional climate, air quality, and their interactions over the continental US and their interactions using WRF/Chem version 3.6.1
Source: Copernicus journal article supplement (doi:10.5194/gmd-9-671-2016), 2016-02-18
Supplement: Supplementary file 1 [file gmd-9-671-2016-supplement.pdf]

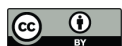

## *Supplement of*

# **Decadal evaluation of regional climate, air quality, and their interactions over the continental US and their interactions using WRF/Chem version 3.6.1**

**K. Yahya et al.**

*Correspondence to:* Yang Zhang (yzhang9@ncsu.edu)

The copyright of individual parts of the supplement might differ from the CC-BY 3.0 licence.

## 1. List of Acronyms

Table S1. List of Acronyms used in the paper

| Acronym   | Full Name                                                                           |
|-----------|-------------------------------------------------------------------------------------|
| AER/AFWA  | The Atmospheric and Environmental Research Inc. and Air Force Weather Agency scheme |
| AERONET   | The Aerosol Robotic Network                                                         |
| AIRS-AQS  | the Aerometric Information Retrieval System– Air Quality System                     |
| AOD       | Aerosol optical depth                                                               |
| BCs       | Boundary Conditions                                                                 |
| CAM5      | The Community Atmosphere Model version 5                                            |
| CASTNET   | The Clean Air Status and Trends Network                                             |
| CALIOP    | The Cloud-Aerosol Lidar with Orthogonal Polarization                                |
| CB05      | The Carbon Bond 2005                                                                |
| CCN       | Cloud condensation nuclei                                                           |
| CDNC      | Cloud droplet number concentration                                                  |
| CERES     | The Clouds and the Earth’s Radiant Energy System                                    |
| CESM      | The Community Earth System Model                                                    |
| CESM_NCSU | CESM/CAM5 developed at the North Carolina State University                          |
| CLDFRA    | Cloud fraction                                                                      |
| CMAQ      | The Community Multiscale Air Quality Model                                          |
| CMIP5     | The Coupled Model Intercomparison Project Phase 5                                   |
| CONUS     | Continental U.S.                                                                    |
| COT       | Cloud optical thickness                                                             |
| CRU       | Climatic Research Unit                                                              |
| CWP       | Cloud water path                                                                    |
| EC        | Elemental carbon                                                                    |
| GCMs      | General circulation models                                                          |
| GCTMs     | Global chemical transport models                                                    |
| GLW       | Longwave radiation                                                                  |
| GPCP      | Global Precipitation Climatology Project                                            |
| GSW       | Net shortwave radiation                                                             |
| ICs       | Initial Conditions                                                                  |
| IMPROVE   | The Interagency Monitoring of Protected Visual Environments                         |
| IOA       | Index of Agreement                                                                  |
| IPCC      | The Intergovernmental Panel on Climate Change                                       |
| JFD       | January, February and December                                                      |
| JJA       | June, July, and August                                                              |
| LSM       | Land Surface Model                                                                  |
| LST       | local standard time                                                                 |
| LWCF      | Longwave cloud forcing                                                              |

|                                        |                                                                                                                   |
|----------------------------------------|-------------------------------------------------------------------------------------------------------------------|
| MADE/VBS                               | The Modal for Aerosol Dynamics in Europe / Volatility Basis Set                                                   |
| MAM                                    | March, April, and May                                                                                             |
| MAN                                    | The Maritime Aerosol Network                                                                                      |
| MB                                     | Mean bias                                                                                                         |
| MEGAN2                                 | The Model of Emissions of Gases and Aerosols from Nature version 2                                                |
| MODIS                                  | The Moderate Resolution Imaging Spectroradiometer                                                                 |
| MSKF                                   | The Multi-Scale Kain-Fritsch cumulus scheme                                                                       |
| NADP                                   | The National Atmospheric Deposition Network                                                                       |
| NARR                                   | The North American Regional Reanalyses                                                                            |
| NCDC                                   | The National Climatic Data Center                                                                                 |
| NCEP                                   | The National Centers for Environmental Prediction                                                                 |
| NCEP FNL                               | The NCEP Final Reanalyses                                                                                         |
| NEI                                    | The National Emission Inventory                                                                                   |
| NH <sub>4</sub> <sup>+</sup>           | Ammonium                                                                                                          |
| NMB                                    | Normalized mean bias                                                                                              |
| NME                                    | Normalized mean error                                                                                             |
| NO <sub>3</sub> <sup>-</sup>           | Nitrate                                                                                                           |
| NO                                     | Nitric oxide                                                                                                      |
| NO <sub>2</sub>                        | Nitrogen dioxide                                                                                                  |
| NO <sub>x</sub>                        | Nitrogen oxide                                                                                                    |
| NOAH                                   | The National Center for Environmental Prediction, Oregon State University, Air Force, and Hydrologic Research Lab |
| O <sub>3</sub>                         | Ozone                                                                                                             |
| OA                                     | Organic aerosol                                                                                                   |
| OC                                     | Organic carbon                                                                                                    |
| OMI                                    | The Ozone Monitoring Instrument                                                                                   |
| PM <sub>2.5</sub> and PM <sub>10</sub> | Particulate matter with diameter less than and equal to 2.5 and 10 μm                                             |
| POA                                    | Primary organic aerosol                                                                                           |
| PRECIS                                 | Providing Regional Climates for Impacts Studies                                                                   |
| PRISM                                  | The Parameter-elevation Regressions on Independent Slopes Model                                                   |
| R                                      | Correlation coefficient                                                                                           |
| RCMs                                   | Regional climate models                                                                                           |
| RCP                                    | The Representative Concentration Pathway                                                                          |
| RH2                                    | Relative humidity at 2-m                                                                                          |
| RRTMG                                  | The Rapid and accurate Radiative Transfer Model for GCM                                                           |
| SEARCH                                 | The Southeastern Aerosol Research and Characterization                                                            |
| SMOKE                                  | The Sparse Matrix Operator Kernel Emissions model                                                                 |
| SOA                                    | Secondary organic aerosol                                                                                         |
| SO <sub>2</sub>                        | Sulfur dioxide                                                                                                    |
| SO <sub>4</sub> <sup>2-</sup>          | Sulfate                                                                                                           |
| SON                                    | September, October, and November                                                                                  |
| STN                                    | The Speciated Trends Network                                                                                      |
| SWCF                                   | Shortwave cloud forcing                                                                                           |
| SWDOWN                                 | Downward shortwave radiation                                                                                      |
| T2                                     | Temperature at 2-m                                                                                                |

|          |                                                           |
|----------|-----------------------------------------------------------|
| TC       | Total carbon, = EC + OC                                   |
| WD10     | Wind direction at 10-m                                    |
| WRF      | Weather Research and Forecasting model                    |
| WRF/Chem | The Weather Research and Forecasting model with Chemistry |
| WS10     | Wind speed at 10-m                                        |

## 2. Mapping of RCP Emissions to CB05 species

Table S2 summarizes the mapping of species from RCP emissions to CB05 species for input into the model. The explanation for the mapping process can be found in the main text.

Table S2. CB05 emissions species for WRF/Chem, their associated full names, their availability in regards to the RCP emissions dataset, and the lumped RCP group species.

| CB05 Species<br>WRF/Chem                | Species Long name                                             | RCP<br>Species<br>Available | RCP Group                  |
|-----------------------------------------|---------------------------------------------------------------|-----------------------------|----------------------------|
| E_ALD2                                  | Acetaldehyde                                                  | Group                       | Other Alkanals             |
| E_ALDX                                  | Higher Aldehydes                                              | Group                       | Hexanes and Higher Alkanes |
| E_BENZENE                               | Benzene                                                       | Yes                         |                            |
| E_CH4                                   | Methane                                                       | Yes                         |                            |
| E_CL2 <sup>1</sup>                      | Chlorine                                                      | No                          |                            |
| E_CO                                    | Carbon Monoxide                                               | Yes                         |                            |
| E_ECI, E_ECJ,<br>E_ECC                  | Elemental Carbon - Nuclei, Accumulation,<br>Coarse Modes      | No, Group,<br>No            | Black Carbon               |
| E_ETH                                   | Ethene                                                        | Yes                         |                            |
| E_ETHA                                  | Ethane                                                        | Yes                         |                            |
| E_ETOH                                  | Ethanol                                                       | Group                       | Alcohols                   |
| E_FORM                                  | Formaldehyde                                                  | Yes                         |                            |
| E_HCL <sup>1</sup>                      | Hydrogen Chloride                                             | No                          |                            |
| E_HONO <sup>1</sup>                     | Nitrous Acid                                                  | No                          |                            |
| E_IOLE                                  | Internal Olefin Carbon Bond                                   | Group                       | Other Alkenes and Alkynes  |
| E_ISOP                                  | Isoprene                                                      | No                          |                            |
| E_MEOH                                  | Methanol                                                      | Group                       | Alcohols                   |
| E_NH3                                   | Ammonia                                                       | Yes                         |                            |
| E_NH4I, E_NH4J <sup>1</sup>             | Ammonium – Nuclei, Accumulation Modes                         | No, No                      |                            |
| E_NO                                    | Nitrogen Oxides                                               | Yes                         |                            |
| E_NO2 <sup>1</sup>                      | Nitrogen Dioxide                                              | No                          |                            |
| E_NO3I, E_NO3J <sup>1</sup> ,<br>E_NO3C | Nitrate – Nuclei, Accumulation, Coarse<br>Modes               | No, No, No                  |                            |
| E_OLE                                   | Terminal Olefin Carbon Bond                                   | Group                       | Other Alkenes and Alkynes  |
| E_ORGI, E_ORGJ,<br>E_ORGC               | Organics – Nuclei, Accumulation, Coarse<br>Modes              | No, Group,<br>No            | Organic Carbon             |
| E_PAR <sup>1</sup>                      | Paraffin Carbon Bond                                          | No                          |                            |
| E_PM10                                  | Unspeciated PM <sub>10</sub>                                  | No                          |                            |
| E_PM25                                  | Unspeciated PM <sub>2.5</sub>                                 | No                          |                            |
| E_PM25I, E_PM25J <sup>1</sup>           | Unspeciated PM <sub>2.5</sub> – Nuclei, Accumulation<br>Modes | No, No                      |                            |
| E_PSULF <sup>1</sup>                    | Sulfuric Acid                                                 | No                          |                            |
| E_SO2                                   | Sulfur Dioxide                                                | Yes                         |                            |
| E_SO4I, E_SO4J, <sup>1</sup><br>E_SO4C  | Sulfate – Nuclei, Accumulation, Coarse<br>Modes               | No, No, No                  |                            |
| E_TERP                                  | Terpene                                                       | No                          |                            |
| E_TOL                                   | Toluene                                                       | Yes                         |                            |
| E_XYL                                   | Xylene                                                        | Yes                         |                            |

<sup>1</sup> Emissions that were taken from 2002 NEI emissions, as well as 2006 and 2010 NEI-derived emissions

### 3. Observational Datasets for Model Evaluation and Operational Evaluation

Table S3 summarizes the observational databases and the variables evaluated in this work. For evaluation of chemical concentrations and meteorological variables, the surface networks include the National Climatic Data Center (NCDC) Quality Controlled Local Climatological Data (QCLCD), Clean Air Status and Trends Network (CASTNET), the Aerometric Information Retrieval System (AIRS) – Air Quality System (AQS), the Interagency Monitoring of Protected Visual Environments (IMPROVE), the Speciated Trends Network (STN), the Southeastern Aerosol Research and Characterization (SEARCH), and the National Atmospheric Deposition Network (NADP). Several aerosol-cloud-radiation variables are also evaluated against satellite retrievals including the Clouds and the Earth’s Radiant Energy System (CERES) and the Moderate Resolution Imaging Spectroradiometer (MODIS).

NCDC QCLCD data contains data over 700 U.S. locations from July 1996 to December 2004, and over 1600 locations from 2005 onwards (<http://www.ncdc.noaa.gov/data-access/land-based-station-data/land-based-datasets/quality-controlled-local-climatological-data-qclcd>). CASTNET observations have been collected in a range of rural environments, from desert to agricultural locations, and from flat to complex terrains ([http://java.epa.gov/castnet/epa\\_jsp/sites.jsp](http://java.epa.gov/castnet/epa_jsp/sites.jsp)). It contains measurement data for meteorological variables and chemical concentrations. AIRS-AQS is the U.S. EPA’s repository for ambient air quality data from over 5000 active monitors (<http://www.epa.gov/ttn/airs/airsaqs/>). While IMPROVE observations have been collected in protected visual environments, i.e., in National Parks and Wilderness Areas (<http://vista.cira.colostate.edu/improve/>), STN sites are located in a range of locations from urban to rural areas (<http://www.epa.gov/ttnamti1/specgen.html>). Both networks contain data for PM<sub>2.5</sub> and major PM<sub>2.5</sub> species. NADP contains precipitation data from rain gauges.

Table S3. Observational datasets and variables evaluated in this study.

| <b>Gases and PM Species</b>                        |                                                                                                                          |                                                   |                                            |
|----------------------------------------------------|--------------------------------------------------------------------------------------------------------------------------|---------------------------------------------------|--------------------------------------------|
| <b>Observational Database</b>                      | <b>Variables Evaluated</b>                                                                                               | <b>Sampling Frequency</b>                         | <b>Number of Sites</b>                     |
| CASTNET                                            | Max 1-hr and 8-hr O <sub>3</sub>                                                                                         | Daily for O <sub>3</sub>                          | ~90                                        |
| AIRS–AQS                                           | O <sub>3</sub>                                                                                                           | Hourly                                            | ~1150                                      |
| IMPROVE                                            | PM <sub>2.5</sub> , SO <sub>4</sub> <sup>2-</sup> , NO <sub>3</sub> <sup>-</sup> , NH <sub>4</sub> <sup>+</sup> , EC, OC | 24-hour data. Data availability once every 3 days | ~160                                       |
| STN                                                | PM <sub>2.5</sub> , SO <sub>4</sub> <sup>2-</sup> , NO <sub>3</sub> <sup>-</sup> , NH <sub>4</sub> <sup>+</sup> , EC, TC | 24-hour data. Data availability once every 3 days | ~200                                       |
| <b>Meteorology</b>                                 |                                                                                                                          |                                                   |                                            |
| <i>Observational Database</i>                      | <i>Variables evaluated</i>                                                                                               | <i>Temporal Resolution</i>                        | <i>Spatial Resolution</i>                  |
| NCDC QCLCD                                         | T2, RH, WS10, WD10                                                                                                       | Hourly                                            | ~700 before 2005<br>~1600 after 2005       |
| NADP                                               | Precipitation                                                                                                            | Weekly                                            | 255                                        |
| <b>Radiation and other Aerosol/Cloud variables</b> |                                                                                                                          |                                                   |                                            |
| <i>Observational Database/ Satellite</i>           | <i>Variables evaluated</i>                                                                                               | <i>Temporal Resolution</i>                        | <i>Number of sites/ Spatial Resolution</i> |
| CERES                                              | SWDOWN                                                                                                                   | Monthly                                           | 1° × 1°                                    |
| MODIS                                              | AOD, CF, COT, CWP, QVAPOR, CCN                                                                                           | Monthly                                           | 1° × 1°                                    |
| MODIS derived based on Bennartz (2007)             | CDNC                                                                                                                     | Monthly                                           | 1° × 1°                                    |

#### 4. Sensitivity simulations to determine precipitation and cloud bias over the Atlantic Ocean

A number of sensitivity simulations were conducted for the month of July 2005 to determine the cause of the precipitation bias, especially over the Atlantic Ocean. The sensitivity simulations consist of (i) **Base**, which is the set-up for the main simulations in this study consisting of monthly reinitialization frequency with CESM\_NCSU ICs/BCs with the Grell 3D cumulus parameterization scheme; (ii) **Sen1**, which is similar to the Base case except with a 5-day reinitialization period; (iii) **Sen2**, which is similar to Base except using NCEP for the meteorological ICs/BCs; and (iv) **Sen3**, which is similar to Base except using WRF/Chem v3.7 with the MSKF cumulus parameterization, instead of Grell 3D. An additional sensitivity simulations using WRF/Chem v3.7 with both MSKF and Grell 3D and their comparison with Figure S1 showed that the differences between Sen3 and Base are mainly caused by the use of different cumulus parameterizations; other model updates between WRF/Chem v3.7 and WRF/Chem v3.6.1 only have minor contributions to such differences. A summary of the set-up of the sensitivity simulations can be found in Table S4.

The sensitivity simulations are evaluated against GPCP and PRISM data and the statistics are summarized in Tables S5 and S6, respectively. GPCP has data over the land and ocean while PRISM only has data over land. The results show that the R value for the **Base** case is the highest against both GPCP and PRISM, even though the NMB is the highest. While using more frequent reinitialization with 5-day (Sen1) reduces both the NMB and NME with slight to moderate improvements, it also reduces the R value. Using NCEP data as ICs/BCs (Sen2) also slightly-to-moderately improve the NMB and NME, indicating that using CESM\_NCSU ICs/BCs contributes to the biases in precipitation. However, NCEP data are not available for future climate simulations.



Lastly, using CESM\_NCSU IC/BCs with the new Multi-Scale Kain Fritsch (MSKF) scheme (Sen3) drastically reduce NMB and NME, but the correlation becomes much worse.

Table S4. Summary of set-up of sensitivity simulations

| No. | Sensitivity Simulation | Reinitialization Frequency | IC/BCs    | Cumulus Parameterization Scheme |
|-----|------------------------|----------------------------|-----------|---------------------------------|
| 1.  | Base                   | Monthly                    | CESM_NCSU | Grell 3D                        |
| 2.  | Sen1                   | 5-day                      | CESM_NCSU | Grell 3D                        |
| 3.  | Sen2                   | Monthly                    | NCEP      | Grell 3D                        |
| 4   | Sen3                   | Monthly                    | CESM_NCSU | MSKF                            |

Table S5. Statistics for sensitivity simulations against GPCP

| Sensitivity Simulation | Mean Obs (mm) | Mean Sim (mm) | R   | NMB (%) | NME (%) |
|------------------------|---------------|---------------|-----|---------|---------|
| <b>Base</b>            | 2.4           | 5.3           | 0.5 | 121.1   | 150.2   |
| <b>Sen1</b>            | 2.4           | 4.2           | 0.4 | 74.1    | 140.9   |
| <b>Sen2</b>            | 2.4           | 4.5           | 0.5 | 85.1    | 122.4   |
| <b>Sen3</b>            | 2.4           | 2.9           | 0.1 | 18.9    | 109.2   |

Table S6. Statistics for sensitivity simulations against PRISM

| Sensitivity Simulation | Mean Obs (mm) | Mean Sim (mm) | R    | NMB (%) | NME (%) |
|------------------------|---------------|---------------|------|---------|---------|
| <b>Base</b>            | 2.3           | 4.0           | 0.7  | 77.8    | 96.5    |
| <b>Sen1</b>            | 2.3           | 2.5           | 0.3  | 11.5    | 102.8   |
| <b>Sen2</b>            | 2.3           | 3.6           | 0.5  | 60.9    | 105.0   |
| <b>Sen3</b>            | 2.3           | 2.2           | -0.2 | -2.1    | 111.9   |

Figure S1 compares the spatial plots of the simulated precipitation with daily average observational precipitation data from GPCP and PRISM for July 2005. The high precipitation over the Atlantic ocean shown in all sensitivity simulations particularly in Sen1 and Sen2 does not exist in the GPCP observational data. The 5-day reinitialization case (Sen1) does not help to reduce the high precipitation over the ocean. Using NCEP data (Sen2) helps to reduce the precipitation over the ocean slightly. Using the MSKF scheme (Sen3) completely reduces the precipitation over the

ocean, however it does not capture well precipitation over the southeastern U.S. The comparison of Sen3 and Base illustrates a very high sensitivity of the simulated precipitation to different cumulus parameterizations, which warrants future study.

## GPCP Obs

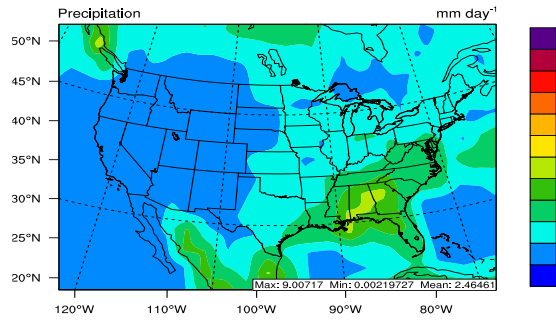

## PRISM Obs

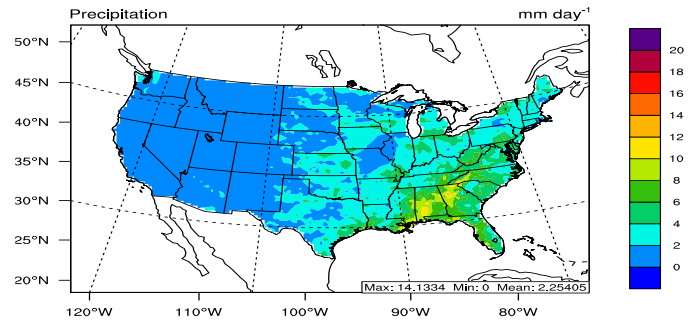

## Base

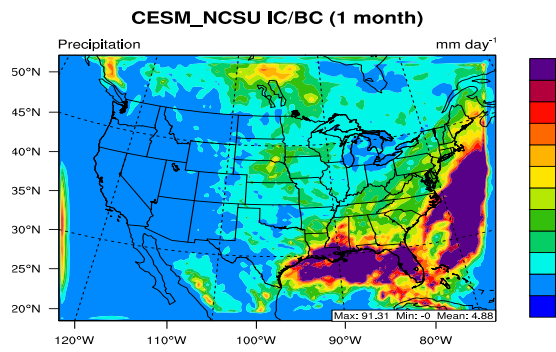

## Sen1

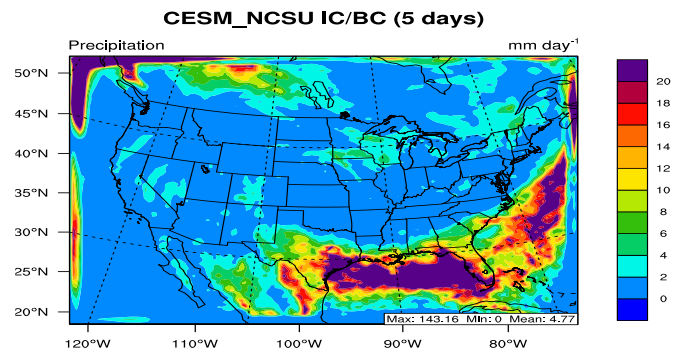

## Sen2

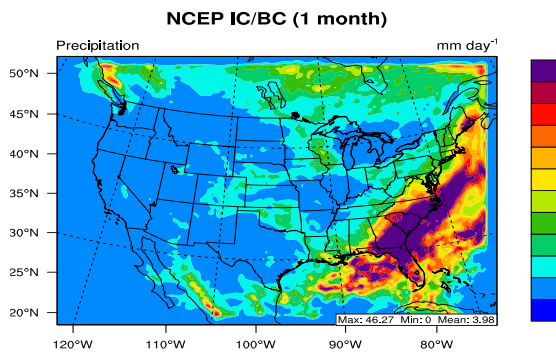

## Sen3

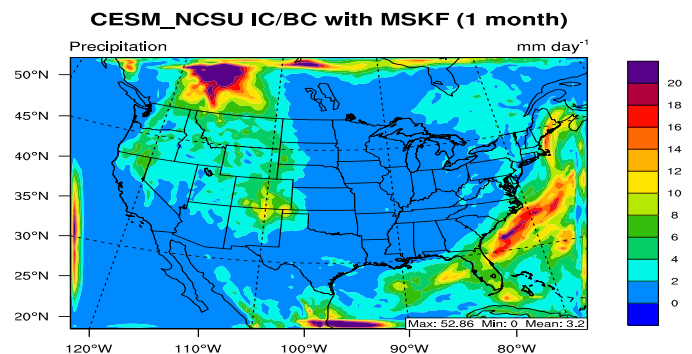

Figure S1. Spatial plots of average daily precipitation for GPCP and PRISM and sensitivity simulation cases for July 2005.

## **References**

Bennartz, R. (2007), Global assessment of marine boundary layer cloud droplet number concentration from satellite, *J. Geophys. Res.*, 112, D02201, doi:10.1029/2006JD007547.
